# Supplementary material
Source: Springer Nature journal article supplement (https://www.springermedizin.de/resource/supplementary/12935_2007_184_MOESM5_ESM.pdf/9541300)

A

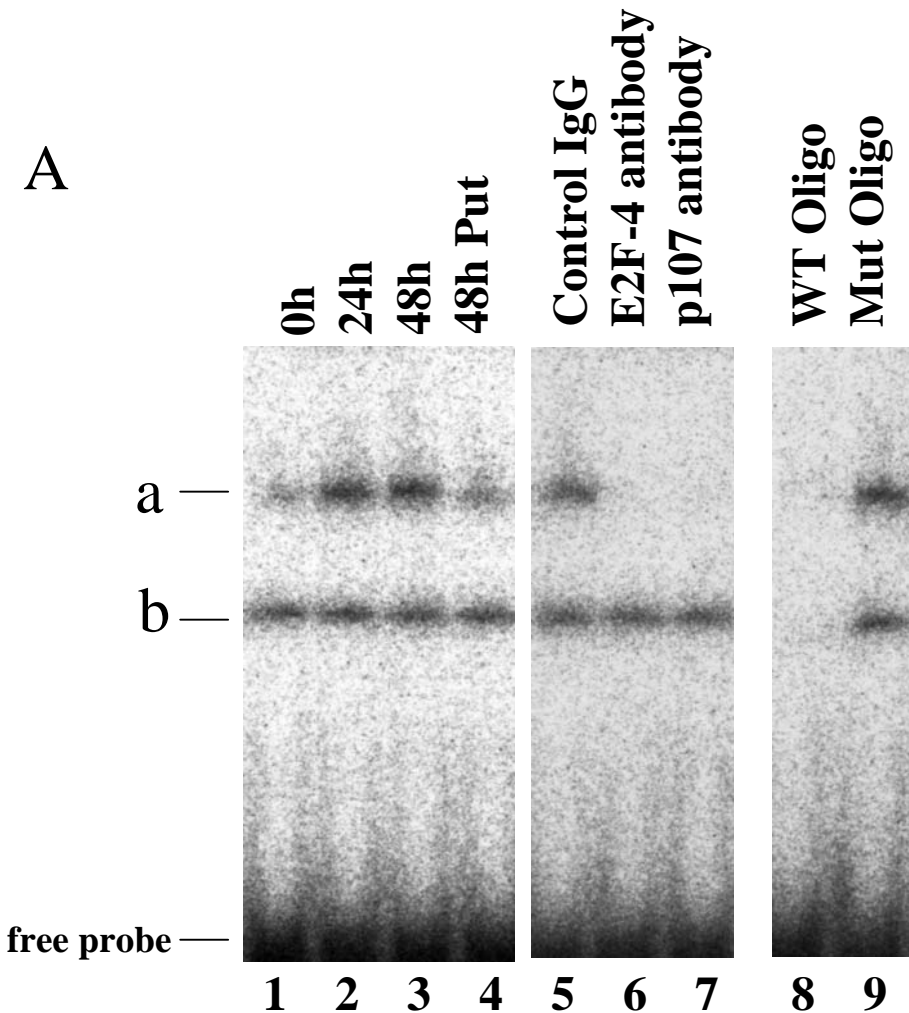

B

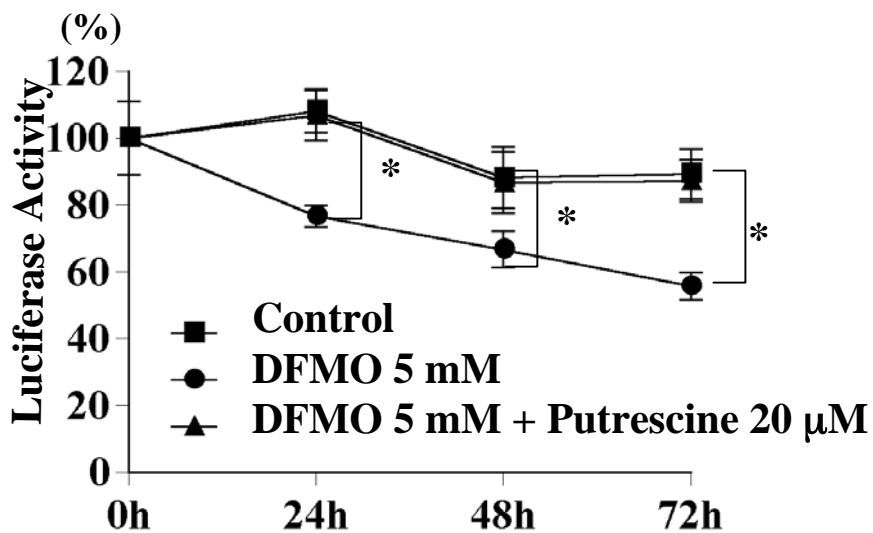

Supplement: MOESM5 [file 9541300]
